# Supplementary material for: Chiral lanthanide lumino-glass for a circularly polarized light security device
Source: PubMed Central journal article supplement (PMC9814105; doi:10.1038/s42004-020-00366-1), 2020-08-25
Supplement: 42004_2020_366_MOESM2_ESM.pdf [file 42004_2020_366_MOESM2_ESM.pdf]

## Description of Additional Supplementary Files

File Name: Supplementary Data 1

Description: Calculation data of the most stable  $\text{Eu}(+\text{tfc})_3(\text{H}_2\text{O})(\text{tmpo})$  structure

File Name: Supplementary Data 2

Description: Calculation data of the most stable  $\text{Eu}(+\text{tfc})_3(\text{tmpo})_2$  structure

File Name: Supplementary Data 3

Description: Calculation data of the second most stable  $\text{Eu}(+\text{tfc})_3(\text{tmpo})_2$  structure
