# Supplementary material for: Chiral lanthanide lumino-glass for a circularly polarized light security device
Source: PubMed Central journal article supplement (PMC9814105; doi:10.1038/s42004-020-00366-1), 2020-08-25
Supplement: 42004_2020_366_MOESM3_ESM.pdf [file 42004_2020_366_MOESM3_ESM.pdf]

(a) The most stable  $\text{Eu}(\text{+tfc})_3(\text{H}_2\text{O})(\text{tmpo})$  structure

|    |                 |                 |                 |
|----|-----------------|-----------------|-----------------|
| Eu | 8.769221893622  | 8.367320858551  | 10.275398772483 |
| P  | 6.428828256097  | 6.417564460142  | 8.167488321163  |
| F  | 7.067433923409  | 11.726056837608 | 7.120878663519  |
| F  | 8.810641828278  | 11.900046241678 | 5.806947991231  |
| F  | 8.745491553468  | 13.005713797026 | 7.695695341068  |
| F  | 13.055931515576 | 8.410893357501  | 14.034976561968 |
| F  | 11.200562359060 | 9.074382934437  | 14.993949976708 |
| F  | 12.084465345876 | 10.253209557446 | 13.374017213324 |
| F  | 5.372874379081  | 9.056292403155  | 14.441603920464 |
| F  | 7.190228545415  | 8.766101043618  | 15.636545778482 |
| F  | 6.437926901624  | 7.152501198785  | 14.369549232053 |
| O  | 8.286018934109  | 9.737409985784  | 8.285191529386  |
| O  | 10.749233585318 | 8.397044193172  | 8.916598205710  |
| O  | 10.669764670472 | 8.805403627262  | 11.719865318686 |
| O  | 9.490017322233  | 6.220207385067  | 11.063735366491 |
| O  | 7.785842387358  | 8.140445818820  | 12.379206603242 |
| O  | 8.863711606518  | 10.655432004551 | 11.057905202004 |
| O  | 7.021803380086  | 7.064166193195  | 9.440729228133  |
| C  | 8.420124206500  | 11.822984677272 | 7.109330052914  |
| C  | 9.082323536789  | 10.632248766550 | 7.837507473672  |
| C  | 10.473143342557 | 10.615515336979 | 7.946647496363  |
| C  | 11.196618901593 | 9.496942384973  | 8.485443427752  |
| C  | 12.670982258171 | 9.903498163281  | 8.532481931862  |
| C  | 12.651951988597 | 10.946549506624 | 9.719366653862  |
| C  | 11.916080275820 | 12.187761934571 | 9.122757473069  |
| C  | 11.519627625344 | 11.693568732884 | 7.693321282915  |
| C  | 12.767439654872 | 10.839526185218 | 7.269363661882  |
| C  | 13.644148658593 | 8.749891929567  | 8.699067915295  |
| C  | 12.560145287579 | 10.091298329424 | 5.940188133263  |
| C  | 14.080232778434 | 11.636831701747 | 7.170899179581  |
| C  | 11.848162866307 | 8.992658941333  | 13.795338128507 |
| C  | 11.011192032746 | 8.183730865720  | 12.772507371459 |
| C  | 10.717151857691 | 6.848963634981  | 13.080435692520 |
| C  | 10.012029934145 | 5.975479657752  | 12.190483607011 |
| C  | 9.923840689669  | 4.613922064981  | 12.893598020869 |

|   |                 |                 |                 |
|---|-----------------|-----------------|-----------------|
| C | 8.882663821332  | 4.909850428936  | 14.041271939324 |
| C | 9.659164667807  | 5.820364637387  | 15.043054114910 |
| C | 11.027723461652 | 6.018544554220  | 14.320392386511 |
| C | 11.288283623520 | 4.605570347847  | 13.684836106777 |
| C | 9.584916970370  | 3.445583489058  | 11.983068298873 |
| C | 12.529032760361 | 4.571536404062  | 12.770972930715 |
| C | 11.420137460699 | 3.460251471881  | 14.705457178478 |
| C | 6.621144754455  | 8.490847913405  | 14.433360637968 |
| C | 7.461010567592  | 9.024285236278  | 13.246860171451 |
| C | 7.730268058173  | 10.389992806855 | 13.215351483366 |
| C | 8.393119909768  | 11.093107973036 | 12.133645787704 |
| C | 8.426308971836  | 12.575150115672 | 12.535568934901 |
| C | 9.472354664174  | 12.603537585038 | 13.709200745924 |
| C | 8.745387679982  | 11.882687086686 | 14.888646409948 |
| C | 7.388064210178  | 11.465983198912 | 14.241070019965 |
| C | 7.053897312403  | 12.680904409975 | 13.305760422476 |
| C | 8.704054653350  | 13.534226824726 | 11.390935955746 |
| C | 5.830774839406  | 12.432215004750 | 12.398420606298 |
| C | 6.841610268250  | 14.011070920502 | 14.050118463156 |
| C | 7.379182785574  | 7.130326577576  | 6.773744556075  |
| C | 6.909035686614  | 8.156500114569  | 5.915761118675  |
| C | 7.801233482974  | 8.826514581800  | 5.048744526951  |
| C | 9.159601023221  | 8.481526038034  | 5.053580612624  |
| C | 9.662838225379  | 7.492954967873  | 5.912594989151  |
| C | 8.773615270946  | 6.841224196918  | 6.787425944170  |
| C | 6.590612281407  | 4.597104909512  | 8.264289043153  |
| C | 6.189893194616  | 4.059682806555  | 9.511975947265  |
| C | 6.474365748550  | 2.719964482944  | 9.848052666634  |
| C | 7.124604540674  | 1.910271576421  | 8.907270442676  |
| C | 7.472772723878  | 2.402350017754  | 7.635365932336  |
| C | 7.190201293285  | 3.744083962939  | 7.300433777440  |
| C | 4.631608677870  | 6.724108227329  | 8.026461502263  |
| C | 3.829948143224  | 7.352693554956  | 9.013072919561  |
| C | 2.449060666475  | 7.547253327586  | 8.771729716827  |
| C | 1.883683869397  | 7.115886659347  | 7.562005213115  |
| C | 2.651470637424  | 6.470186844952  | 6.578289678810  |

|   |                 |                 |                 |
|---|-----------------|-----------------|-----------------|
| C | 4.018985893820  | 6.262084284025  | 6.835952706016  |
| H | 12.136804211818 | 10.519053027803 | 10.606914683826 |
| H | 13.698080173384 | 11.177518924246 | 10.020727036682 |
| H | 11.008811463549 | 12.454379293746 | 9.702105668144  |
| H | 12.570377012835 | 13.086160785854 | 9.078287350881  |
| H | 11.228547807360 | 12.495095339248 | 6.985609327837  |
| H | 13.400693532019 | 8.180336787825  | 9.623663494524  |
| H | 14.692899254184 | 9.115293052193  | 8.775593829469  |
| H | 13.581671805453 | 8.039803500825  | 7.843209415011  |
| H | 13.401812625491 | 9.388414508271  | 5.742826521031  |
| H | 12.515220883839 | 10.810321438326 | 5.090188953125  |
| H | 11.614144984748 | 9.509627578300  | 5.938598043494  |
| H | 14.362681976511 | 12.158934002269 | 8.108916463163  |
| H | 14.000489049372 | 12.407369019012 | 6.369523639809  |
| H | 14.924642527885 | 10.961652017376 | 6.902128995808  |
| H | 7.983576736561  | 5.416097882577  | 13.637461550390 |
| H | 8.550285394418  | 3.952606991730  | 14.502056824894 |
| H | 9.156077672003  | 6.794978391210  | 15.210272807638 |
| H | 9.787531974795  | 5.336458190761  | 16.036539828988 |
| H | 11.841306020911 | 6.403720289764  | 14.965679331124 |
| H | 8.634932011970  | 3.634186210769  | 11.436035533916 |
| H | 9.475563596542  | 2.501311236066  | 12.563366017931 |
| H | 10.375327154084 | 3.293320012772  | 11.213690942665 |
| H | 12.615319749945 | 3.586289650584  | 12.257694271450 |
| H | 13.455539637418 | 4.719226964237  | 13.371800022561 |
| H | 12.506299641363 | 5.364000486129  | 11.991043930401 |
| H | 10.543826019705 | 3.350517236161  | 15.378263496854 |
| H | 12.316355878333 | 3.622572621433  | 15.347873919761 |
| H | 11.557315373459 | 2.486740005328  | 14.181175632086 |
| H | 10.412730530728 | 12.094860780667 | 13.409344193947 |
| H | 9.731333818051  | 13.658505206201 | 13.951921209491 |
| H | 9.299500762566  | 10.990867112378 | 15.247720514232 |
| H | 8.592089743121  | 12.557060050753 | 15.760163818879 |
| H | 6.593755831975  | 11.202519095182 | 14.966128981428 |
| H | 9.725611515714  | 13.367115669696 | 10.984584210635 |
| H | 8.637699427483  | 14.592042539715 | 11.732058690088 |

|   |                 |                 |                 |
|---|-----------------|-----------------|-----------------|
| H | 7.991847930219  | 13.383455138507 | 10.550011971614 |
| H | 5.680811845272  | 13.291857369494 | 11.705149404369 |
| H | 4.908232852538  | 12.335072116743 | 13.016612344156 |
| H | 5.929080919745  | 11.511652782909 | 11.779846753084 |
| H | 7.694250935158  | 14.311136454634 | 14.695334963169 |
| H | 5.939097304983  | 13.940960184387 | 14.700608327175 |
| H | 6.666250977348  | 14.839610675415 | 13.326444724098 |
| O | 5.585484271708  | 8.462053545171  | 5.995723289870  |
| H | 7.450276941482  | 9.636920841129  | 4.395419354756  |
| H | 9.851087041744  | 9.023288702510  | 4.386778261109  |
| H | 10.738379607683 | 7.269240065097  | 5.939761593795  |
| O | 9.157872488506  | 5.939960586945  | 7.728004932258  |
| O | 5.487375333703  | 4.885804397609  | 10.343679103886 |
| H | 6.162326690529  | 2.324930045714  | 10.827186961300 |
| H | 7.348517191390  | 0.858389486762  | 9.155015558470  |
| H | 7.949753994911  | 1.731109994078  | 6.905591588911  |
| O | 7.474090904054  | 4.288117785525  | 6.086116173393  |
| O | 4.441690973538  | 7.759697423720  | 10.161788013480 |
| H | 1.814194687511  | 8.040139701597  | 9.521567112269  |
| H | 0.806834205447  | 7.280815626014  | 7.385285164823  |
| H | 2.187715516913  | 6.122805025878  | 5.643185022963  |
| O | 4.877916514064  | 5.620186773264  | 6.000909410774  |
| C | 5.071368270758  | 9.578871443535  | 5.283949435992  |
| H | 5.595310202960  | 10.518999016529 | 5.572558893734  |
| H | 5.143702003158  | 9.432847088624  | 4.178357690485  |
| H | 4.001156603761  | 9.644274116778  | 5.571598192912  |
| C | 10.514703041907 | 5.515554047780  | 7.835355625789  |
| H | 10.519795981812 | 4.786264913566  | 8.670382724234  |
| H | 10.854345063401 | 5.023988646984  | 6.891558273502  |
| H | 11.174191548496 | 6.373050973127  | 8.095908407254  |
| C | 6.073670390257  | 5.192147079122  | 11.618670259315 |
| H | 7.094918127192  | 5.607051763776  | 11.481026596914 |
| H | 5.435558243285  | 5.974305705709  | 12.073338570610 |
| H | 6.100706595017  | 4.296574138282  | 12.285027837489 |
| C | 8.398903354916  | 3.637679296334  | 5.230988257854  |
| H | 9.337911897397  | 3.368275931996  | 5.771743987553  |

|   |                |                |                 |
|---|----------------|----------------|-----------------|
| H | 7.965786538250 | 2.715899118792 | 4.770299229850  |
| H | 8.637075290413 | 4.369521015073 | 4.430405457432  |
| C | 3.683009772637 | 8.353928215069 | 11.214514998182 |
| H | 2.897681517477 | 7.653097180412 | 11.582091944634 |
| H | 4.407450988226 | 8.560589181987 | 12.028542497636 |
| H | 3.217683719369 | 9.314664301012 | 10.891002225064 |
| C | 4.546289041854 | 5.434644113713 | 4.636772969352  |
| H | 3.715064398000 | 4.699668856181 | 4.507896400424  |
| H | 4.266225371692 | 6.403928054973 | 4.158598763478  |
| H | 5.465400156002 | 5.034983673577 | 4.161556040964  |
| O | 6.469113981303 | 9.646380631518 | 10.203283577019 |
| H | 5.899602692330 | 8.848861757918 | 10.033761823437 |
| H | 6.749930898096 | 9.975036642428 | 9.307442541333  |
