# Supplementary material for: Chiral lanthanide lumino-glass for a circularly polarized light security device
Source: PubMed Central journal article supplement (PMC9814105; doi:10.1038/s42004-020-00366-1), 2020-08-25
Supplement: 42004_2020_366_MOESM4_ESM.pdf [file 42004_2020_366_MOESM4_ESM.pdf]

(b) The most stable  $\text{Eu}(\text{+tfc})_3(\text{tmpo})_2$  structure

|    |                 |                 |                 |
|----|-----------------|-----------------|-----------------|
| Eu | 10.000718792755 | 9.029248881402  | 10.618046548069 |
| P  | 8.766665774091  | 6.003392415260  | 8.539825086749  |
| P  | 13.667359003949 | 8.232462153912  | 9.596208469744  |
| F  | 12.742516927558 | 12.638128556406 | 12.672703963282 |
| F  | 11.719178389753 | 14.218161696514 | 11.562775735509 |
| F  | 13.632661713104 | 13.448801183127 | 10.844267924570 |
| F  | 5.683693808778  | 8.281795068994  | 14.034660267312 |
| F  | 5.179103226679  | 6.697896543534  | 12.615749803730 |
| F  | 5.244695066233  | 8.785039295103  | 11.956347833534 |
| F  | 6.987415584574  | 13.772142449044 | 10.896370268156 |
| F  | 5.500580936170  | 12.250385953654 | 11.415747759561 |
| F  | 6.428241716832  | 12.243718514518 | 9.438827839926  |
| O  | 11.413988150951 | 10.931405711058 | 11.193495890959 |
| O  | 10.307036238539 | 10.288311646034 | 8.535900657587  |
| O  | 7.792798723669  | 8.448074087342  | 11.451456426175 |
| O  | 10.308171025935 | 7.146755075401  | 12.181823434953 |
| O  | 8.461645640315  | 10.890539305350 | 10.414841028731 |
| O  | 9.729280578034  | 9.822169525256  | 12.924596272473 |
| O  | 9.269713642924  | 7.306777623261  | 9.167282846013  |
| O  | 12.280266997114 | 8.355804740392  | 10.230013860164 |
| C  | 12.450409231939 | 13.076106726191 | 11.428553059576 |
| C  | 11.696939309976 | 12.008286862665 | 10.590337729227 |
| C  | 11.376742741172 | 12.350801205939 | 9.271851292285  |
| C  | 10.710717308908 | 11.467811124081 | 8.356967754305  |
| C  | 10.621165225838 | 12.235085457023 | 7.015113207698  |
| C  | 12.113259697554 | 12.246603580672 | 6.519798420227  |
| C  | 12.829993361570 | 13.233224439565 | 7.494670473836  |
| C  | 11.688172860895 | 13.618066961220 | 8.483292466184  |
| C  | 10.432595468851 | 13.706849027458 | 7.552263889702  |
| C  | 9.604821567207  | 11.725784706999 | 6.008192073094  |
| C  | 9.118072119967  | 13.902571703092 | 8.331613562371  |
| C  | 10.518894171437 | 14.793696857835 | 6.465872909884  |
| C  | 5.861790621060  | 7.879949569592  | 12.741251112558 |
| C  | 7.364386193226  | 7.719965381945  | 12.392038593266 |
| C  | 8.105688436134  | 6.822178255901  | 13.169728790377 |

|   |                 |                 |                 |
|---|-----------------|-----------------|-----------------|
| C | 9.514278661545  | 6.613744304629  | 13.000471358828 |
| C | 9.914161109162  | 5.526041275613  | 14.028663567524 |
| C | 9.270344709138  | 4.230498651076  | 13.410593081019 |
| C | 7.734858154816  | 4.436292398572  | 13.619352832059 |
| C | 7.665603249677  | 5.855416505768  | 14.263195381026 |
| C | 8.916784312328  | 5.865247614709  | 15.202618725811 |
| C | 11.388298365789 | 5.434772444997  | 14.386614099079 |
| C | 9.190273150223  | 7.241720760153  | 15.833697655026 |
| C | 8.875311663793  | 4.817324505781  | 16.329591140539 |
| C | 6.672548382646  | 12.451554516040 | 10.754798783175 |
| C | 7.804656129403  | 11.538102705543 | 11.293890623665 |
| C | 8.022901542655  | 11.555343644282 | 12.672593558130 |
| C | 9.011282283734  | 10.757609122380 | 13.354076759109 |
| C | 8.997687537883  | 11.212942418696 | 14.825104410006 |
| C | 7.645694934551  | 10.608028780752 | 15.355812129322 |
| C | 6.544341306159  | 11.465996415623 | 14.654721969103 |
| C | 7.383681206762  | 12.422958809757 | 13.754746917120 |
| C | 8.630038818385  | 12.737349181612 | 14.653861427241 |
| C | 10.255311365602 | 10.861566582054 | 15.603429775634 |
| C | 9.708507336249  | 13.550185201282 | 13.917062743092 |
| C | 8.300472424250  | 13.461922914652 | 15.971865509931 |
| C | 10.138390641155 | 5.016521526201  | 7.813443950692  |
| C | 10.155288798090 | 4.461795117015  | 6.507098478942  |
| C | 11.076018482098 | 3.448621572102  | 6.160635301753  |
| C | 12.058426222903 | 3.072536946887  | 7.087964949768  |
| C | 12.165930021389 | 3.704611970984  | 8.332697510954  |
| C | 11.219877795451 | 4.692155600164  | 8.687473149188  |
| C | 7.790868764554  | 4.909676102731  | 9.695899981224  |
| C | 6.468091298868  | 5.359723885579  | 9.981049518031  |
| C | 5.478654260419  | 4.483193085793  | 10.479770776395 |
| C | 5.824935131768  | 3.158667169638  | 10.768484452405 |
| C | 7.138202925241  | 2.701113606957  | 10.589026130423 |
| C | 8.119989699555  | 3.575290570702  | 10.070521819818 |
| C | 7.470442443005  | 6.285014168547  | 7.245531861304  |
| C | 7.017252578466  | 7.590997671931  | 6.913597159832  |
| C | 5.833893059174  | 7.760339303161  | 6.150485777202  |

|   |                 |                 |                 |
|---|-----------------|-----------------|-----------------|
| C | 5.117518294941  | 6.641074659187  | 5.711864540045  |
| C | 5.551843332664  | 5.337895150277  | 6.012252861574  |
| C | 6.730479116888  | 5.171799683503  | 6.766149393337  |
| C | 13.733372576477 | 6.932317697096  | 8.293004738155  |
| C | 14.719373260324 | 5.913627356025  | 8.197939474188  |
| C | 14.896612825297 | 5.180325359005  | 7.004723026750  |
| C | 14.006996969872 | 5.382832410841  | 5.940253780058  |
| C | 12.931436611875 | 6.271127084087  | 6.051179924686  |
| C | 12.780102923992 | 7.030851816672  | 7.233350053923  |
| C | 14.359588395635 | 9.814764096311  | 8.881483853283  |
| C | 14.706333344086 | 10.030250792552 | 7.516133919125  |
| C | 15.613960895216 | 11.047593411907 | 7.144718145429  |
| C | 16.159821850985 | 11.885053270093 | 8.127104504715  |
| C | 15.786431143903 | 11.754902629041 | 9.469003659455  |
| C | 14.864691444884 | 10.748920115880 | 9.833017837224  |
| C | 14.988585348039 | 7.881520432240  | 10.853628918666 |
| C | 14.688316659871 | 7.686722404124  | 12.223735890758 |
| C | 15.728653190908 | 7.635386212812  | 13.183485059472 |
| C | 17.061529189106 | 7.785249531649  | 12.790788546642 |
| C | 17.388276649969 | 7.972514387199  | 11.433724360892 |
| C | 16.357681485784 | 8.000701088390  | 10.475579079485 |
| H | 12.537953349852 | 11.220029762484 | 6.546931971660  |
| H | 12.157448457916 | 12.593829073678 | 5.462449609037  |
| H | 13.669136136434 | 12.762960310013 | 8.041444353272  |
| H | 13.235045402616 | 14.122684144683 | 6.961764934657  |
| H | 11.888833369233 | 14.522690445242 | 9.089760904142  |
| H | 9.715844241678  | 10.634633675885 | 5.837049496911  |
| H | 9.720874097893  | 12.247911000404 | 5.031135949947  |
| H | 8.570064792244  | 11.901287947793 | 6.369972844498  |
| H | 8.239288614196  | 13.903900387491 | 7.647614733989  |
| H | 9.124260021202  | 14.877252247168 | 8.870186603064  |
| H | 8.952024547402  | 13.103810462841 | 9.083634780740  |
| H | 11.416339131039 | 14.716554772656 | 5.815521306154  |
| H | 10.535150280091 | 15.802477744247 | 6.939771697762  |
| H | 9.624232527925  | 14.752534542003 | 5.803107032210  |
| H | 9.551980068301  | 4.127086589207  | 12.339816754523 |

|   |                 |                 |                 |
|---|-----------------|-----------------|-----------------|
| H | 9.650919751957  | 3.328142735548  | 13.941383460444 |
| H | 7.167801511082  | 4.419458575092  | 12.669863739534 |
| H | 7.297471862184  | 3.656874465930  | 14.282987644438 |
| H | 6.702063839398  | 6.090494089705  | 14.756500286944 |
| H | 11.567841409282 | 4.590552160287  | 15.091243904479 |
| H | 11.742228206378 | 6.371002058803  | 14.870532106536 |
| H | 12.022081000437 | 5.284223447970  | 13.491172976673 |
| H | 10.122375423917 | 7.225079887605  | 16.443965615466 |
| H | 8.354262651915  | 7.540485930802  | 16.506388762565 |
| H | 9.301062152134  | 8.033423395917  | 15.063003521495 |
| H | 8.737349561561  | 3.773992795197  | 15.974412996094 |
| H | 8.036926912153  | 5.045788098067  | 17.027934506397 |
| H | 9.818092903548  | 4.843156184476  | 16.922640050340 |
| H | 7.564679671258  | 9.531762385262  | 15.100903198011 |
| H | 7.606196752937  | 10.684448018865 | 16.465843694921 |
| H | 5.855047944289  | 10.852277104669 | 14.040492404891 |
| H | 5.927428294126  | 12.032335247851 | 15.387586667212 |
| H | 6.835311457093  | 13.313036153040 | 13.389662365498 |
| H | 10.421386702174 | 9.763196024993  | 15.614608042386 |
| H | 10.185518494202 | 11.214181139637 | 16.657705672555 |
| H | 11.150555257784 | 11.323590914145 | 15.130222624202 |
| H | 10.630114723221 | 13.652985531476 | 14.533006855630 |
| H | 9.336946707884  | 14.575655297064 | 13.690203042534 |
| H | 9.99956909111   | 13.084208862905 | 12.954490068574 |
| H | 7.573751128057  | 12.924999977302 | 16.617551424022 |
| H | 7.874881499680  | 14.469092323522 | 15.754913218161 |
| H | 9.226675634027  | 13.614669136340 | 16.572166185322 |
| O | 9.303601894081  | 5.005351716103  | 5.592504466287  |
| H | 11.068650286733 | 3.005911079454  | 5.153743819558  |
| H | 12.797968223939 | 2.302139032368  | 6.808747435597  |
| H | 12.987442116135 | 3.450023689061  | 9.016096187990  |
| O | 11.235411141303 | 5.358380252130  | 9.851237312338  |
| O | 6.213370113016  | 6.662999153497  | 9.710064257462  |
| H | 4.463551378474  | 4.849656897306  | 10.683146877505 |
| H | 5.063539219722  | 2.473695301638  | 11.179178740143 |
| H | 7.398907161813  | 1.672940939647  | 10.876236120772 |

|   |                 |                 |                 |
|---|-----------------|-----------------|-----------------|
| O | 9.406020849828  | 3.180662465270  | 9.892374378201  |
| O | 7.732151510653  | 8.639726438953  | 7.372099084776  |
| H | 5.482049617097  | 8.773173873206  | 5.905213198367  |
| H | 4.197301531479  | 6.782928626816  | 5.118987678731  |
| H | 4.985494408752  | 4.466301549124  | 5.651930658711  |
| O | 7.236455062397  | 3.941518831733  | 7.083829551428  |
| O | 15.425741954524 | 5.627105660254  | 9.327775043882  |
| H | 15.676551439904 | 4.408246468744  | 6.932664102003  |
| H | 14.121813443483 | 4.786980722451  | 5.018382167517  |
| H | 12.198443788051 | 6.356902754888  | 5.237808999234  |
| O | 11.780302977451 | 7.903819711020  | 7.429418900286  |
| O | 14.138042434703 | 9.212572844569  | 6.594173092011  |
| H | 15.874389351120 | 11.207478805914 | 6.089175165180  |
| H | 16.861788751331 | 12.683297163165 | 7.831227352891  |
| H | 16.165933116202 | 12.458641505225 | 10.221859870878 |
| O | 14.443625110864 | 10.590199458368 | 11.114233613843 |
| O | 13.404117999480 | 7.521619905334  | 12.651563615766 |
| H | 15.452176191827 | 7.470538744040  | 14.237204185049 |
| H | 17.867801567261 | 7.748220612996  | 13.543638593299 |
| H | 18.440651598488 | 8.073129589840  | 11.128324173488 |
| O | 16.597040452624 | 8.124924210912  | 9.135930007489  |
| C | 8.911614947492  | 4.254078717537  | 4.456598219466  |
| H | 9.720621460537  | 4.207644189559  | 3.686803997139  |
| H | 8.609881028476  | 3.219199228694  | 4.743710547364  |
| H | 8.033168167854  | 4.785386301652  | 4.031935345563  |
| C | 12.240040335024 | 5.096434817206  | 10.825623146808 |
| H | 12.122785407136 | 5.904569638730  | 11.571726744395 |
| H | 12.076853583688 | 4.093334034011  | 11.290080363745 |
| H | 13.262449515535 | 5.147953593402  | 10.388969963860 |
| C | 4.875852893952  | 7.072366805197  | 9.436985956965  |
| H | 4.241166793251  | 7.033070226482  | 10.349196404015 |
| H | 4.952107598501  | 8.126024058664  | 9.105067831574  |
| H | 4.437087241511  | 6.451384520368  | 8.620434590695  |
| C | 9.792092523052  | 1.843244019001  | 10.149840865242 |
| H | 9.690676530379  | 1.589858211580  | 11.233025270604 |
| H | 9.202930480152  | 1.116610501204  | 9.538851682721  |

|   |                 |                 |                 |
|---|-----------------|-----------------|-----------------|
| H | 10.859889132644 | 1.784950746389  | 9.851169759584  |
| C | 7.084150380062  | 9.887197066759  | 7.619593358860  |
| H | 6.136062998460  | 9.737242566770  | 8.184446827095  |
| H | 7.781471939005  | 10.467339510486 | 8.254147342971  |
| H | 6.871034864705  | 10.435779877748 | 6.671660821437  |
| C | 6.365752046110  | 2.820788022991  | 7.128254004625  |
| H | 5.454763630479  | 3.045623689386  | 7.731862050169  |
| H | 6.071202074830  | 2.480390580216  | 6.105136289672  |
| H | 6.938109895576  | 2.014195259995  | 7.631708453316  |
| C | 16.683954181156 | 4.982579846459  | 9.233285833222  |
| H | 16.579020486112 | 3.893092146560  | 9.007455002240  |
| H | 17.326040280257 | 5.463160603330  | 8.457528586019  |
| H | 17.160691662359 | 5.105176149711  | 10.229354871325 |
| C | 10.821640379289 | 8.141852468093  | 6.402445828828  |
| H | 10.064980022348 | 8.797058990147  | 6.870970664314  |
| H | 11.304013295994 | 8.653509694910  | 5.534043375831  |
| H | 10.336640188267 | 7.198330535258  | 6.064936511865  |
| C | 14.550225714356 | 9.259643702402  | 5.239629110048  |
| H | 14.264131411866 | 10.226306738022 | 4.758889897178  |
| H | 15.651111679082 | 9.100493580458  | 5.137382509397  |
| H | 14.016826525716 | 8.422880781484  | 4.741988675768  |
| C | 15.274595596698 | 11.050360210805 | 12.178767949096 |
| H | 16.311480258536 | 10.655904057044 | 12.060995303517 |
| H | 15.277244302690 | 12.160831802285 | 12.241144105596 |
| H | 14.825356746783 | 10.641758094214 | 13.104649007078 |
| C | 12.796005760643 | 8.658582915859  | 13.293172068614 |
| H | 12.737878031568 | 9.520983321623  | 12.593898401686 |
| H | 11.763555374252 | 8.357545740507  | 13.546557770795 |
| H | 13.352403088980 | 8.938225582203  | 14.222467212643 |
| C | 17.824577088106 | 8.680095778242  | 8.691314355912  |
| H | 18.039786700217 | 9.644056310170  | 9.210732963526  |
| H | 18.678453532378 | 7.972530633627  | 8.833088480712  |
| H | 17.689099438193 | 8.881193570034  | 7.608321585874  |
