# Supplementary material for: Chiral lanthanide lumino-glass for a circularly polarized light security device
Source: PubMed Central journal article supplement (PMC9814105; doi:10.1038/s42004-020-00366-1), 2020-08-25
Supplement: 42004_2020_366_MOESM5_ESM.pdf [file 42004_2020_366_MOESM5_ESM.pdf]

(c) The second most stable  $\text{Eu}(\text{+tfc})_3(\text{+tmpo})_2$  structure

|    |                 |                 |                 |
|----|-----------------|-----------------|-----------------|
| Eu | 10.158138227184 | 8.714719574955  | 10.478349346553 |
| P  | 7.606640120874  | 7.083165455754  | 8.071260496908  |
| P  | 13.873730124085 | 8.616862760384  | 11.411521234851 |
| F  | 9.820611191918  | 13.702132335869 | 9.813618098523  |
| F  | 9.346993748534  | 13.604399082688 | 7.688841970678  |
| F  | 11.418688636661 | 13.871745887092 | 8.330309002278  |
| F  | 9.376253479685  | 6.617530384981  | 15.699463395075 |
| F  | 7.725391892937  | 5.607658150836  | 14.693598995685 |
| F  | 7.762510696665  | 7.789894596952  | 14.812344723938 |
| F  | 5.678346378380  | 11.810241802763 | 11.097193969943 |
| F  | 5.404448216951  | 10.753275044212 | 12.999419944684 |
| F  | 5.344264835303  | 9.646116512908  | 11.136114254717 |
| O  | 10.172578881136 | 11.088889139161 | 9.758110653188  |
| O  | 11.469606612590 | 8.854014315054  | 8.363927330731  |
| O  | 9.214401777827  | 7.865666274911  | 12.632127124159 |
| O  | 10.491770773125 | 6.278207568347  | 10.551453827885 |
| O  | 7.967002311679  | 9.676894772331  | 10.896863327823 |
| O  | 10.486184271018 | 10.230948453235 | 12.406513735979 |
| O  | 8.788570574774  | 7.836261247142  | 8.705846093520  |
| O  | 12.361201494289 | 8.359572108426  | 11.322622418902 |
| C  | 10.252429517787 | 13.216658709019 | 8.636024021265  |
| C  | 10.472154112820 | 11.673666354514 | 8.673047584536  |
| C  | 10.986323464335 | 11.086067397770 | 7.513145370511  |
| C  | 11.440889601443 | 9.722917358907  | 7.453582844163  |
| C  | 11.953446963897 | 9.521183631589  | 6.003936741352  |
| C  | 13.256469183254 | 10.392050426679 | 5.927830527143  |
| C  | 12.742810900834 | 11.863317146508 | 5.949015354624  |
| C  | 11.206692299475 | 11.673368649130 | 6.124132948445  |
| C  | 10.910217291331 | 10.417571623630 | 5.231105125917  |
| C  | 12.122933382882 | 8.081190583645  | 5.550412159908  |
| C  | 9.471482637227  | 9.879840891907  | 5.341884780676  |
| C  | 11.222593128252 | 10.626102104023 | 3.737492180493  |
| C  | 8.540630273138  | 6.706153786554  | 14.621699352147 |
| C  | 9.304542138559  | 6.771842271555  | 13.264025416096 |
| C  | 9.987993853980  | 5.624165281717  | 12.848205065331 |

|   |                 |                 |                 |
|---|-----------------|-----------------|-----------------|
| C | 10.493748105337 | 5.466841501918  | 11.510692377237 |
| C | 10.987204107412 | 3.999719352759  | 11.424406286852 |
| C | 9.669143141178  | 3.151642860326  | 11.463552276045 |
| C | 9.160356649774  | 3.300966637398  | 12.929311385782 |
| C | 10.203902452126 | 4.285738281568  | 13.544440205678 |
| C | 11.551125741452 | 3.816864961228  | 12.882093553949 |
| C | 11.899065399623 | 3.697420323923  | 10.256109821178 |
| C | 12.757501588656 | 4.732855051616  | 13.170379891479 |
| C | 11.959121130570 | 2.373552959367  | 13.230557393344 |
| C | 5.978916673686  | 10.654628105261 | 11.766842301407 |
| C | 7.513722226362  | 10.428847770269 | 11.820148651532 |
| C | 8.230339708295  | 11.079790498702 | 12.828159582202 |
| C | 9.644118010164  | 10.904462856704 | 13.043340273357 |
| C | 9.977897108255  | 11.677470164005 | 14.342579545145 |
| C | 9.275615863548  | 10.788980014505 | 15.440724895624 |
| C | 7.750827579524  | 11.058425896270 | 15.242045249893 |
| C | 7.744431688132  | 11.967016540157 | 13.976349886876 |
| C | 8.987771169600  | 12.889918866663 | 14.210280232515 |
| C | 11.453978955980 | 11.959315263523 | 14.573533980976 |
| C | 9.288881137706  | 13.794912549659 | 13.001479673550 |
| C | 8.912715305284  | 13.774635184553 | 15.467586969678 |
| C | 7.883469575435  | 6.908969719620  | 6.251935894204  |
| C | 7.042235528175  | 7.441529772471  | 5.234154816684  |
| C | 7.367809438276  | 7.271850547931  | 3.866422977089  |
| C | 8.522520281073  | 6.566387272856  | 3.508319102646  |
| C | 9.370132163263  | 6.024420077586  | 4.485757327191  |
| C | 9.050254280379  | 6.209308383075  | 5.846759734056  |
| C | 7.345173543291  | 5.414510522649  | 8.828922243983  |
| C | 6.961879672255  | 5.457373133131  | 10.199794057416 |
| C | 6.412190225590  | 4.327335736390  | 10.845141668609 |
| C | 6.313232025209  | 3.122727474657  | 10.139775950474 |
| C | 6.721890323946  | 3.029708820273  | 8.801124770629  |
| C | 7.212669504164  | 4.179394868008  | 8.139510212097  |
| C | 5.990141978984  | 7.946941710713  | 8.287019617232  |
| C | 5.986540001667  | 9.365115018643  | 8.185210336122  |
| C | 4.799565632813  | 10.105941189304 | 8.374715680659  |

|   |                 |                 |                 |
|---|-----------------|-----------------|-----------------|
| C | 3.603798194188  | 9.426850704128  | 8.636327403929  |
| C | 3.556175883932  | 8.026228797532  | 8.662935592425  |
| C | 4.741568539980  | 7.288115460730  | 8.444557329870  |
| C | 14.815467997671 | 7.036182208580  | 11.429863142387 |
| C | 15.784389639103 | 6.629587952762  | 12.383245448971 |
| C | 16.465052660281 | 5.396729711032  | 12.226155648502 |
| C | 16.215012090802 | 4.604603916804  | 11.096621334246 |
| C | 15.279102096220 | 4.989807769806  | 10.124147102620 |
| C | 14.561744673529 | 6.188360976624  | 10.319136948105 |
| C | 14.480722606968 | 9.649962839722  | 10.004074171591 |
| C | 15.574037880124 | 9.368529544924  | 9.142566009017  |
| C | 16.100315231210 | 10.373063448104 | 8.296677412595  |
| C | 15.530405499404 | 11.655662459109 | 8.303609621031  |
| C | 14.436936193202 | 11.960965652485 | 9.122688976534  |
| C | 13.915239074955 | 10.954147600378 | 9.961659167030  |
| C | 14.329108818114 | 9.530925931077  | 12.953260512133 |
| C | 13.723375895580 | 9.076345030617  | 14.155594028291 |
| C | 13.936982625023 | 9.742537641683  | 15.382720247020 |
| C | 14.784475848193 | 10.857181795715 | 15.414101559840 |
| C | 15.453217453682 | 11.290962807184 | 14.260794449277 |
| C | 15.259374802787 | 10.600981029269 | 13.041055135518 |
| H | 13.930420479470 | 10.156802641961 | 6.777975056797  |
| H | 13.813766159905 | 10.152632928436 | 4.993694477961  |
| H | 13.160473272469 | 12.448743481844 | 6.791801440887  |
| H | 12.985782840081 | 12.406528793596 | 5.008496303339  |
| H | 10.602334173344 | 12.571071637921 | 5.887653285875  |
| H | 11.296694953714 | 7.451148898714  | 5.936475574706  |
| H | 13.082708199506 | 7.660346677262  | 5.918017667875  |
| H | 12.131736440732 | 8.014892572898  | 4.438977772547  |
| H | 9.359999040779  | 8.967204511197  | 4.716491719449  |
| H | 8.737278049953  | 10.632214692244 | 4.970478633333  |
| H | 9.177937755184  | 9.599892563158  | 6.375736945549  |
| H | 12.271732102729 | 10.922913946684 | 3.526209555602  |
| H | 10.560174379565 | 11.421972736007 | 3.324283366647  |
| H | 11.017274182424 | 9.695393044536  | 3.160765710894  |
| H | 8.943044869397  | 3.519207618987  | 10.709267345506 |

|   |                 |                 |                 |
|---|-----------------|-----------------|-----------------|
| H | 9.896356498887  | 2.092891036046  | 11.204908732545 |
| H | 8.141580525324  | 3.733206674315  | 12.985406866572 |
| H | 9.140544200643  | 2.326884496597  | 13.467807805183 |
| H | 10.206307353132 | 4.321546140190  | 14.653205284716 |
| H | 12.110941957808 | 2.607275506864  | 10.174613816804 |
| H | 12.861495715289 | 4.235991835877  | 10.361666468237 |
| H | 11.417545673100 | 4.041871798667  | 9.315803386405  |
| H | 13.664650050950 | 4.368311246656  | 12.636231826260 |
| H | 12.996055198180 | 4.737545909556  | 14.258917299428 |
| H | 12.598848269116 | 5.784581719865  | 12.850889147344 |
| H | 11.177134674221 | 1.613889093201  | 13.018962089410 |
| H | 12.209874900504 | 2.301433240175  | 14.314510290981 |
| H | 12.869569458490 | 2.081550250482  | 12.658570511377 |
| H | 9.533714052467  | 9.716440515791  | 15.303986329436 |
| H | 9.630059077927  | 11.089192675860 | 16.452391259906 |
| H | 7.171760482644  | 10.131790083582 | 15.062810554308 |
| H | 7.302218856400  | 11.572998684410 | 16.121365838014 |
| H | 6.795056373354  | 12.508380694408 | 13.798735936617 |
| H | 12.070545253003 | 11.127714523330 | 14.171668114199 |
| H | 11.689609027618 | 12.077789454599 | 15.654566990871 |
| H | 11.780789801460 | 12.889054509299 | 14.057873094901 |
| H | 10.246864381893 | 14.347365405009 | 13.141353609596 |
| H | 8.483743365215  | 14.555243288959 | 12.876637331684 |
| H | 9.358084524499  | 13.221657831385 | 12.053802051205 |
| H | 8.756375146720  | 13.209100867272 | 16.410574826981 |
| H | 8.078504474904  | 14.508362132072 | 15.374242312675 |
| H | 9.857422105846  | 14.354217056462 | 15.584698691738 |
| O | 5.922788243037  | 8.096342514755  | 5.623227469522  |
| H | 6.716027830780  | 7.688130360518  | 3.084930835230  |
| H | 8.773394801974  | 6.441338560760  | 2.440780672427  |
| H | 10.284139342472 | 5.490042787661  | 4.190118052306  |
| O | 9.826075936005  | 5.726691597775  | 6.854633747964  |
| O | 7.104448742291  | 6.659600948889  | 10.803645308402 |
| H | 6.083756255109  | 4.383396568049  | 11.891410360831 |
| H | 5.914824011633  | 2.227875648626  | 10.648118599533 |
| H | 6.641770256221  | 2.068743790861  | 8.272974742679  |

|   |                 |                 |                 |
|---|-----------------|-----------------|-----------------|
| O | 7.528367989259  | 4.165933178508  | 6.815475263104  |
| O | 7.155932647267  | 9.930979965058  | 7.814790246963  |
| H | 4.816227956817  | 11.203941492911 | 8.367537851025  |
| H | 2.680222716083  | 10.004417912827 | 8.814313940274  |
| H | 2.596652797807  | 7.512924431212  | 8.821323329781  |
| O | 4.734574538724  | 5.929680901786  | 8.319148000137  |
| O | 16.037308863971 | 7.473524583924  | 13.415301560216 |
| H | 17.206511471654 | 5.067842151492  | 12.968351754450 |
| H | 16.766531779632 | 3.656459842729  | 10.971521618700 |
| H | 15.100762634493 | 4.360873171373  | 9.240079138541  |
| O | 13.597195243039 | 6.644889890615  | 9.494838887865  |
| O | 16.098369004318 | 8.114094483151  | 9.190462127459  |
| H | 16.942142299871 | 10.156717471284 | 7.623740987967  |
| H | 15.937386980490 | 12.430852943011 | 7.631902765522  |
| H | 13.988329086440 | 12.963359655137 | 9.106299611114  |
| O | 12.897922671997 | 11.154478267253 | 10.829564444800 |
| O | 12.983270424534 | 7.950078861489  | 14.048152302353 |
| H | 13.431787060395 | 9.407494063616  | 16.299268773945 |
| H | 14.937840958553 | 11.396619895635 | 16.364682677814 |
| H | 16.144729009218 | 12.143942082047 | 14.318273428737 |
| O | 15.968712542099 | 10.901864620758 | 11.919018752079 |
| C | 5.215268758930  | 8.929150612404  | 4.722955775222  |
| H | 5.895829237311  | 9.660824330315  | 4.223845971661  |
| H | 4.669766558890  | 8.339674908696  | 3.945500792581  |
| H | 4.479739587834  | 9.476622592112  | 5.350228448659  |
| C | 10.698903532810 | 4.646329666739  | 6.573271012270  |
| H | 11.030277974343 | 4.264775804179  | 7.558764867732  |
| H | 10.168539849601 | 3.836180698367  | 6.018545318963  |
| H | 11.594002609743 | 4.975025828893  | 5.991650503975  |
| C | 6.346614569461  | 6.953092106462  | 11.974192700501 |
| H | 6.515955718145  | 6.197983492300  | 12.771009910867 |
| H | 6.720979724910  | 7.928725631319  | 12.326366744989 |
| H | 5.262269047761  | 7.015188399174  | 11.722028691458 |
| C | 7.230606872107  | 3.039354205150  | 6.014155862734  |
| H | 7.833952764810  | 2.144662619302  | 6.306569297118  |
| H | 6.145156263555  | 2.776783057407  | 6.054257165706  |

|   |                 |                 |                 |
|---|-----------------|-----------------|-----------------|
| H | 7.499672660832  | 3.335430614256  | 4.977760534652  |
| C | 7.287577444455  | 11.343209397596 | 7.827172067543  |
| H | 7.186980816192  | 11.744515748374 | 8.860928144958  |
| H | 8.303537382501  | 11.542667673321 | 7.445513583229  |
| H | 6.547872275972  | 11.834971014167 | 7.148890067867  |
| C | 3.613178393401  | 5.182553707249  | 8.755512602402  |
| H | 3.351896211684  | 5.417982084972  | 9.815483559239  |
| H | 2.717754595473  | 5.352441564907  | 8.107534986054  |
| H | 3.922073359540  | 4.118484745338  | 8.688809365646  |
| C | 16.843352042018 | 7.063304781628  | 14.504028893915 |
| H | 16.455820022933 | 6.126560902866  | 14.973473851673 |
| H | 17.908786338919 | 6.910145120713  | 14.202165686760 |
| H | 16.787440980311 | 7.892686829343  | 15.240361496072 |
| C | 13.424428160087 | 6.129956989180  | 8.190655544067  |
| H | 12.513955621334 | 6.635757315741  | 7.815830890721  |
| H | 14.306873890930 | 6.382978707159  | 7.553384077190  |
| H | 13.271007841775 | 5.026969729217  | 8.189205252710  |
| C | 17.243748331973 | 7.778977906494  | 8.431429144698  |
| H | 17.054845310557 | 7.860974495682  | 7.332669402868  |
| H | 18.121979024333 | 8.415749393683  | 8.699995094474  |
| H | 17.464345848673 | 6.720481169242  | 8.685937233741  |
| C | 12.542862566685 | 12.468260027188 | 11.239407313610 |
| H | 13.351852303843 | 12.900271928348 | 11.877137727545 |
| H | 12.341520212406 | 13.139230313493 | 10.379136831191 |
| H | 11.613103358220 | 12.344887650861 | 11.820767459244 |
| C | 12.106590668751 | 7.588476508312  | 15.103395287217 |
| H | 11.400198601292 | 8.417754119209  | 15.336043965741 |
| H | 11.534258820616 | 6.721235315431  | 14.730057667816 |
| H | 12.665116669331 | 7.292845927581  | 16.025123401713 |
| C | 16.719868761614 | 12.100769045334 | 11.846535564514 |
| H | 16.088554773552 | 12.995646691462 | 12.066399280473 |
| H | 17.595572627921 | 12.087725856838 | 12.541548715595 |
| H | 17.078463837485 | 12.160753277775 | 10.798158833870 |
